# Supplementary material for: Novel CRYGC Mutation in Conserved Ultraviolet-Protective Tryptophan (p.Trp131Arg) Is Linked to Autosomal Dominant Congenital Cataract
Source: MDPI journal article supplement (doi:10.3390/ijms242316594), 2023-11-22
Supplement: s1 [file s1]

**Table S1.** Cataract-associated gene list used for filtering of WES data.

|          |         |         |        |         |          |          |
|----------|---------|---------|--------|---------|----------|----------|
| ABCA3    | COL4A5  | ETFDH   | HIP1   | MYH9    | PEX7     | SRD5A3   |
| ABCD3    | COL7A1  | EYA1    | HMX1   | MYOC    | PIGY     | STX3     |
| ABHD12   | CPAMD8  | EZR     | HSF4   | NACC1   | PITX2    | TAF1A    |
| ADAM9    | CRYAA   | FAM126A | HSPG2  | NAT8    | PITX3    | TAPT1    |
| ADAMTS18 | CRYAB   | FAR1    | IARS2  | NCOA6   | POLG     | TDRD7    |
| ADAMTSL4 | CRYBA1  | FBN1    | IDO1   | NECAP2  | POMGNT1  | TFAP2A   |
| AGK      | CRYBA2  | FKRP    | IKBKG  | NECTIN3 | POMT1    | TMCO3    |
| ALDH18A1 | CRYBA4  | FKTN    | INPP5K | NEU1    | POMT2    | TMEM70   |
| ANK2     | CRYBB1  | FLNB    | ITM2B  | NF2     | PQBP1    | TNPO1    |
| ARSL     | CRYBB2  | FOXE3   | JAM3   | NHS     | PRDX5    | TRAPPC11 |
| ATAD3A   | CRYBB3  | FTL     | KCNA4  | NOD2    | PROX1    | TRNT1    |
| B3GLCT   | CRYGA   | FYCO1   | KCNAB1 | NR2E3   | PRX      | TRPM3    |
| BCOR     | CRYGB   | FZD4    | KCNJ13 | NRCAM   | PTEN     | TUBA1A   |
| BEST1    | CRYGC   | GALE    | KLRG1  | OAT     | PTH      | TUBB2A   |
| BFSP1    | CRYGD   | GALK1   | LARGE1 | OCRL    | PXDN     | UCHL1    |
| BFSP2    | CRYGS   | GALT    | LEMD2  | OGG1    | RAB3GAP1 | UNC45B   |
| BIN3     | CTDP1   | GCM2    | LIM2   | OPA1    | RECQL4   | VCAN     |
| BRD4     | CYP27A1 | GCNT2   | LMX1B  | OPA3    | RGS6     | VIM      |
| BUB1B    | CYP51A1 | GDF3    | LONP1  | OTX2    | RIC1     | VLDLR    |
| CANX     | DHCR7   | GEMIN4  | LOXL3  | P3H2    | RRAGA    | VSX2     |
| CAV1     | DMPK    | GFER    | LRP2   | PANK4   | RYR1     | WDR36    |
| CC2D2A   | DNASE2B | GJA1    | LRP5   | PARK7   | SALL4    | WDR87    |
| CCNP     | DNM2    | GJA3    | LRP5L  | PAX6    | SC5D     | WFS1     |
| CDC25B   | DNMBP   | GJA8    | LSS    | PEX1    | SEC23A   | WNT3     |
| CHD7     | DOCK5   | GJB6    | MAF    | PEX10   | SIL1     | WRN      |
| CHMP4B   | DYNC1H1 | GLA     | MAFA   | PEX11B  | SIPA1L3  | XRCC1    |
| CLPB     | EFNA5   | GNAS    | MAN2B1 | PEX12   | SIX5     | XYLT2    |
| CNBP     | EIF2B2  | GNPAT   | MED12  | PEX13   | SLC16A12 | YWHAE    |
| CNGB3    | EPG5    | GPR161  | MED13  | PEX14   | SLC33A1  | ZNF350   |
| COL11A1  | EPHA2   | GPX1    | MIP    | PEX16   | SLC4A4   |          |
| COL18A1  | ERCC2   | GSTM1   | MIPEP  | PEX2    | SLC7A8   |          |
| COL2A1   | ERCC6   | GSTT1   | MIR184 | PEX26   | SORD     |          |
| COL4A1   | ERCC8   | GUCY2D  | MMP1   | PEX3    | SOX1     |          |
| COL4A2   | ESCO2   | HCCS    | MVK    | PEX5    | SPARC    |          |
